# Supplementary material for: Cryo–electron microscopy structure and analysis of the P-Rex1–Gβγ signaling scaffold
Source: PubMed Central journal article supplement (PMC6795519; doi:10.1126/sciadv.aax8855), 2019-10-16
Supplement: aax8855_Data_file_S1.pdf [file aax8855_Data_file_S1.pdf]

# Ribbon Map of P-Rex1 (% deuteration)

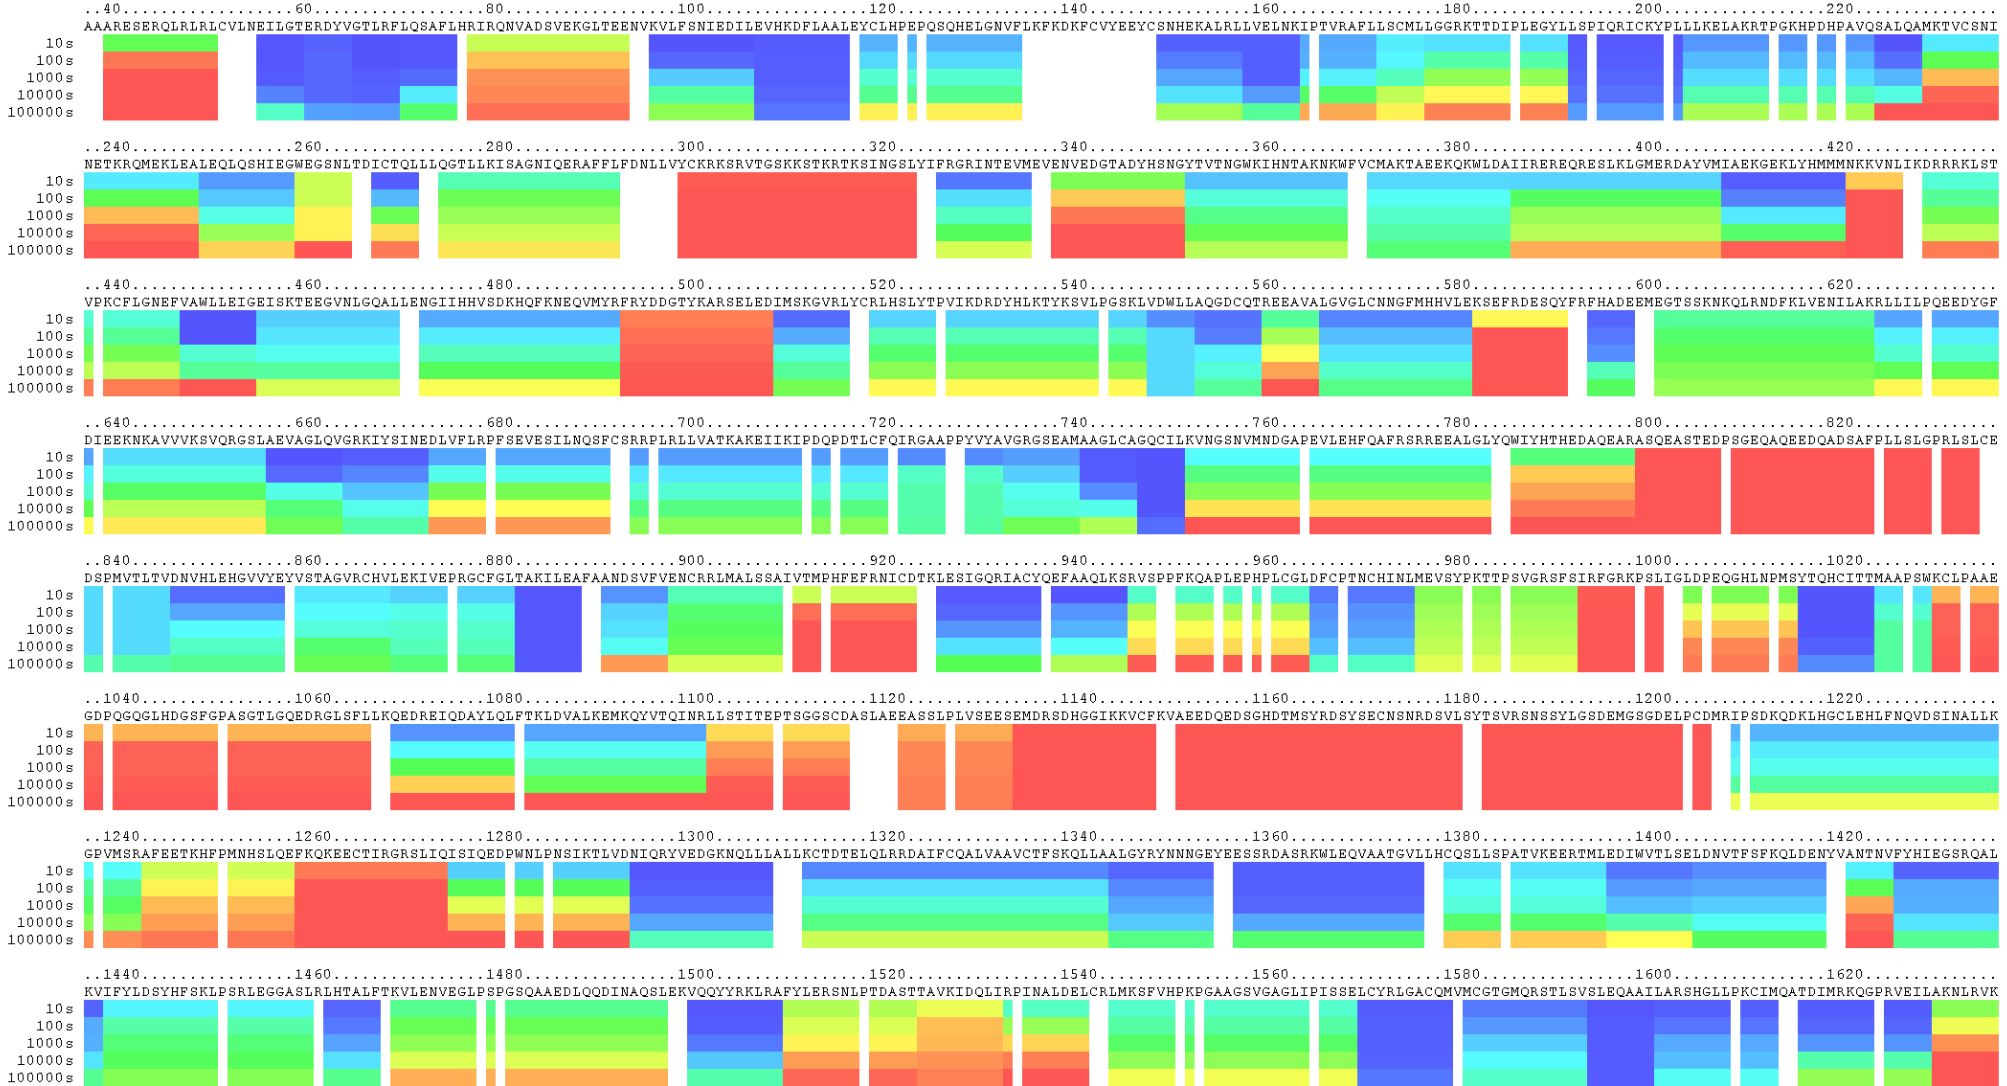

Deuteration level

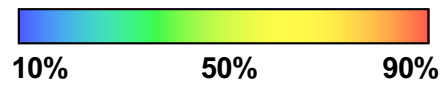

# Ribbon Map of P-Rex1 in Presence of G $\beta$ $\gamma$ (% deuteration)

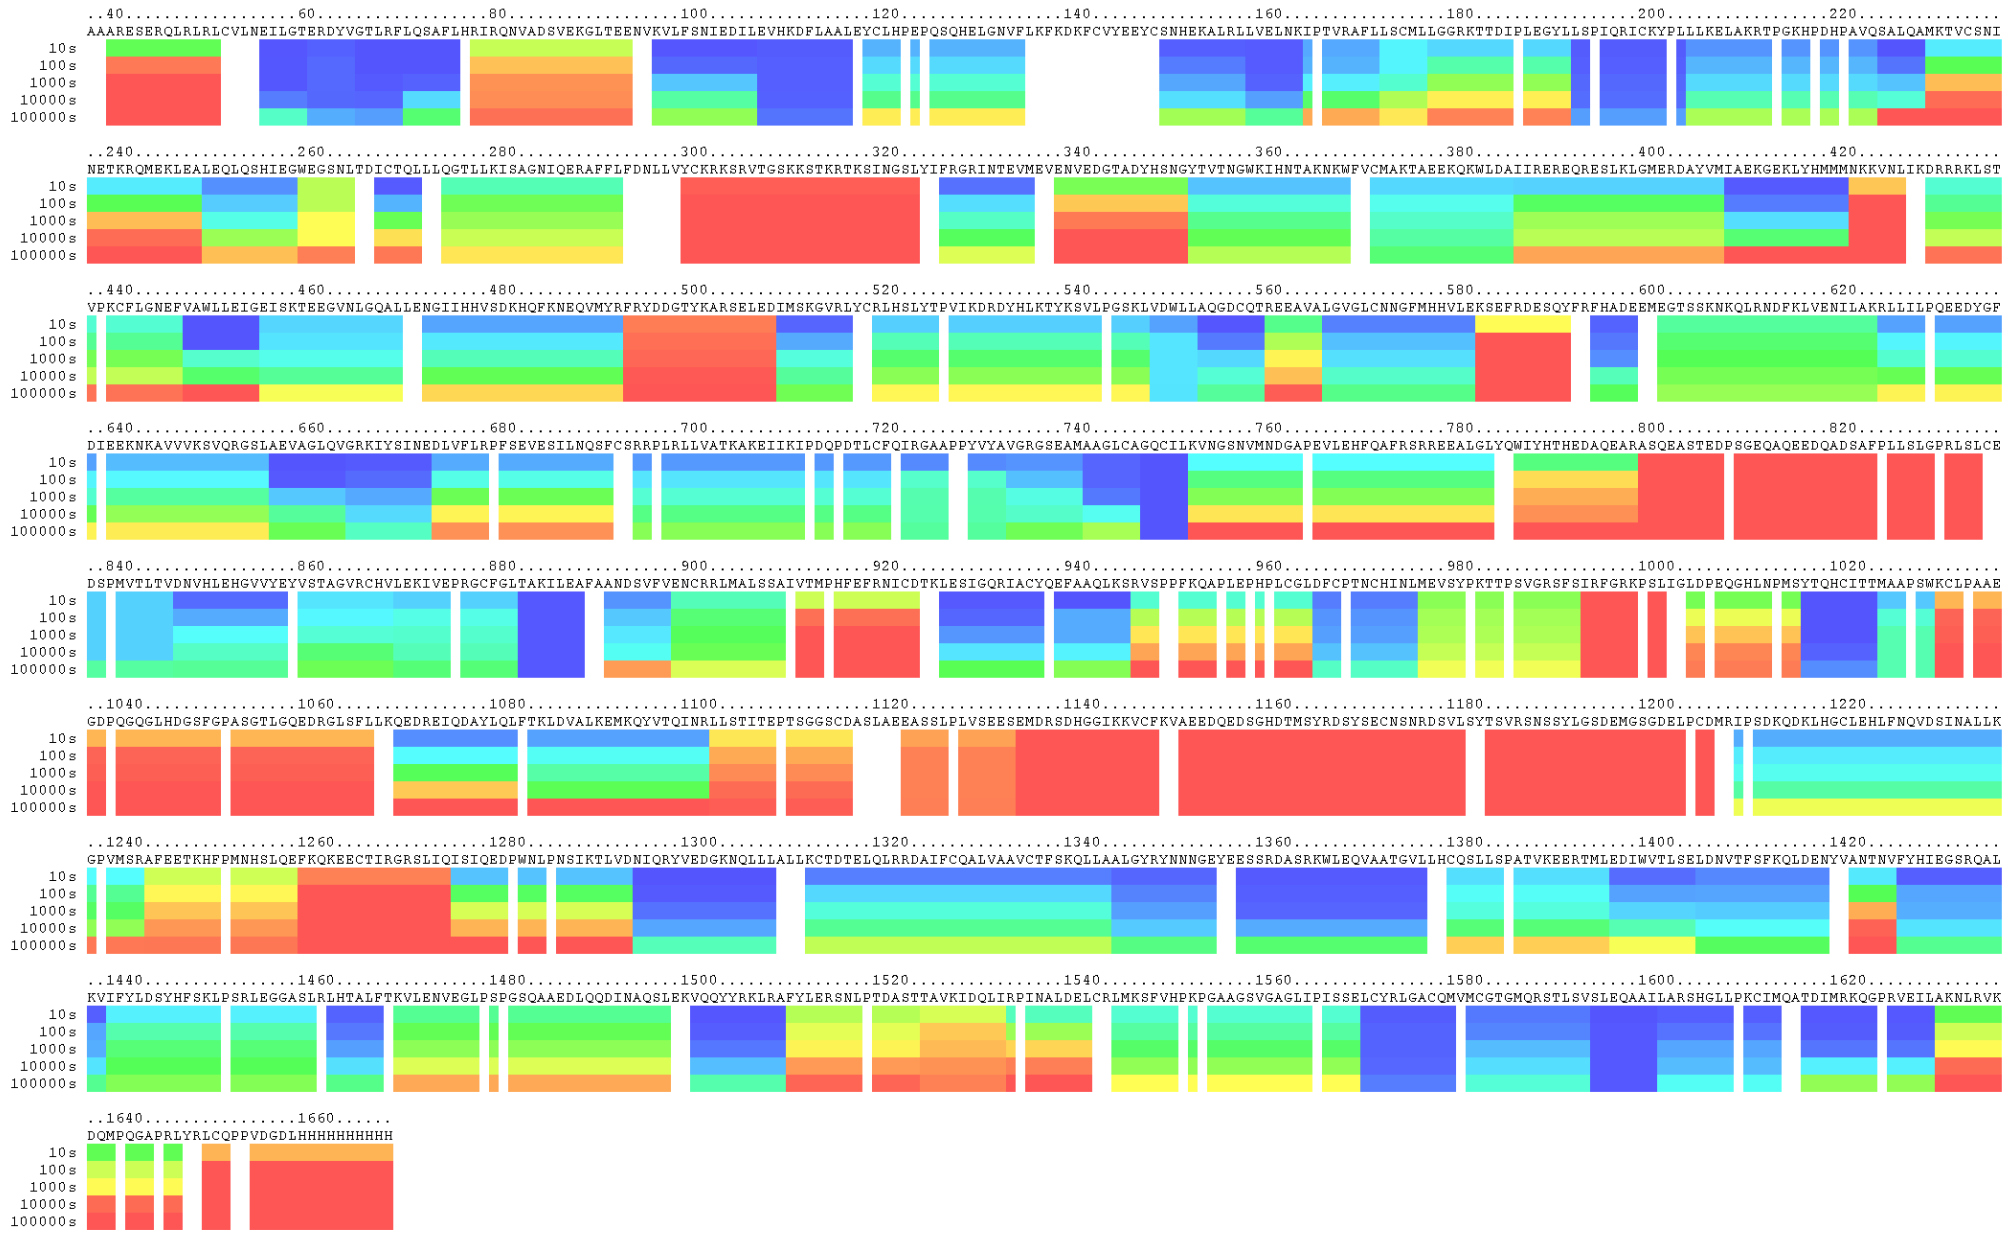

# Influence of $G\beta\gamma$ on Exchange in P-Rex1 (% deuteration)

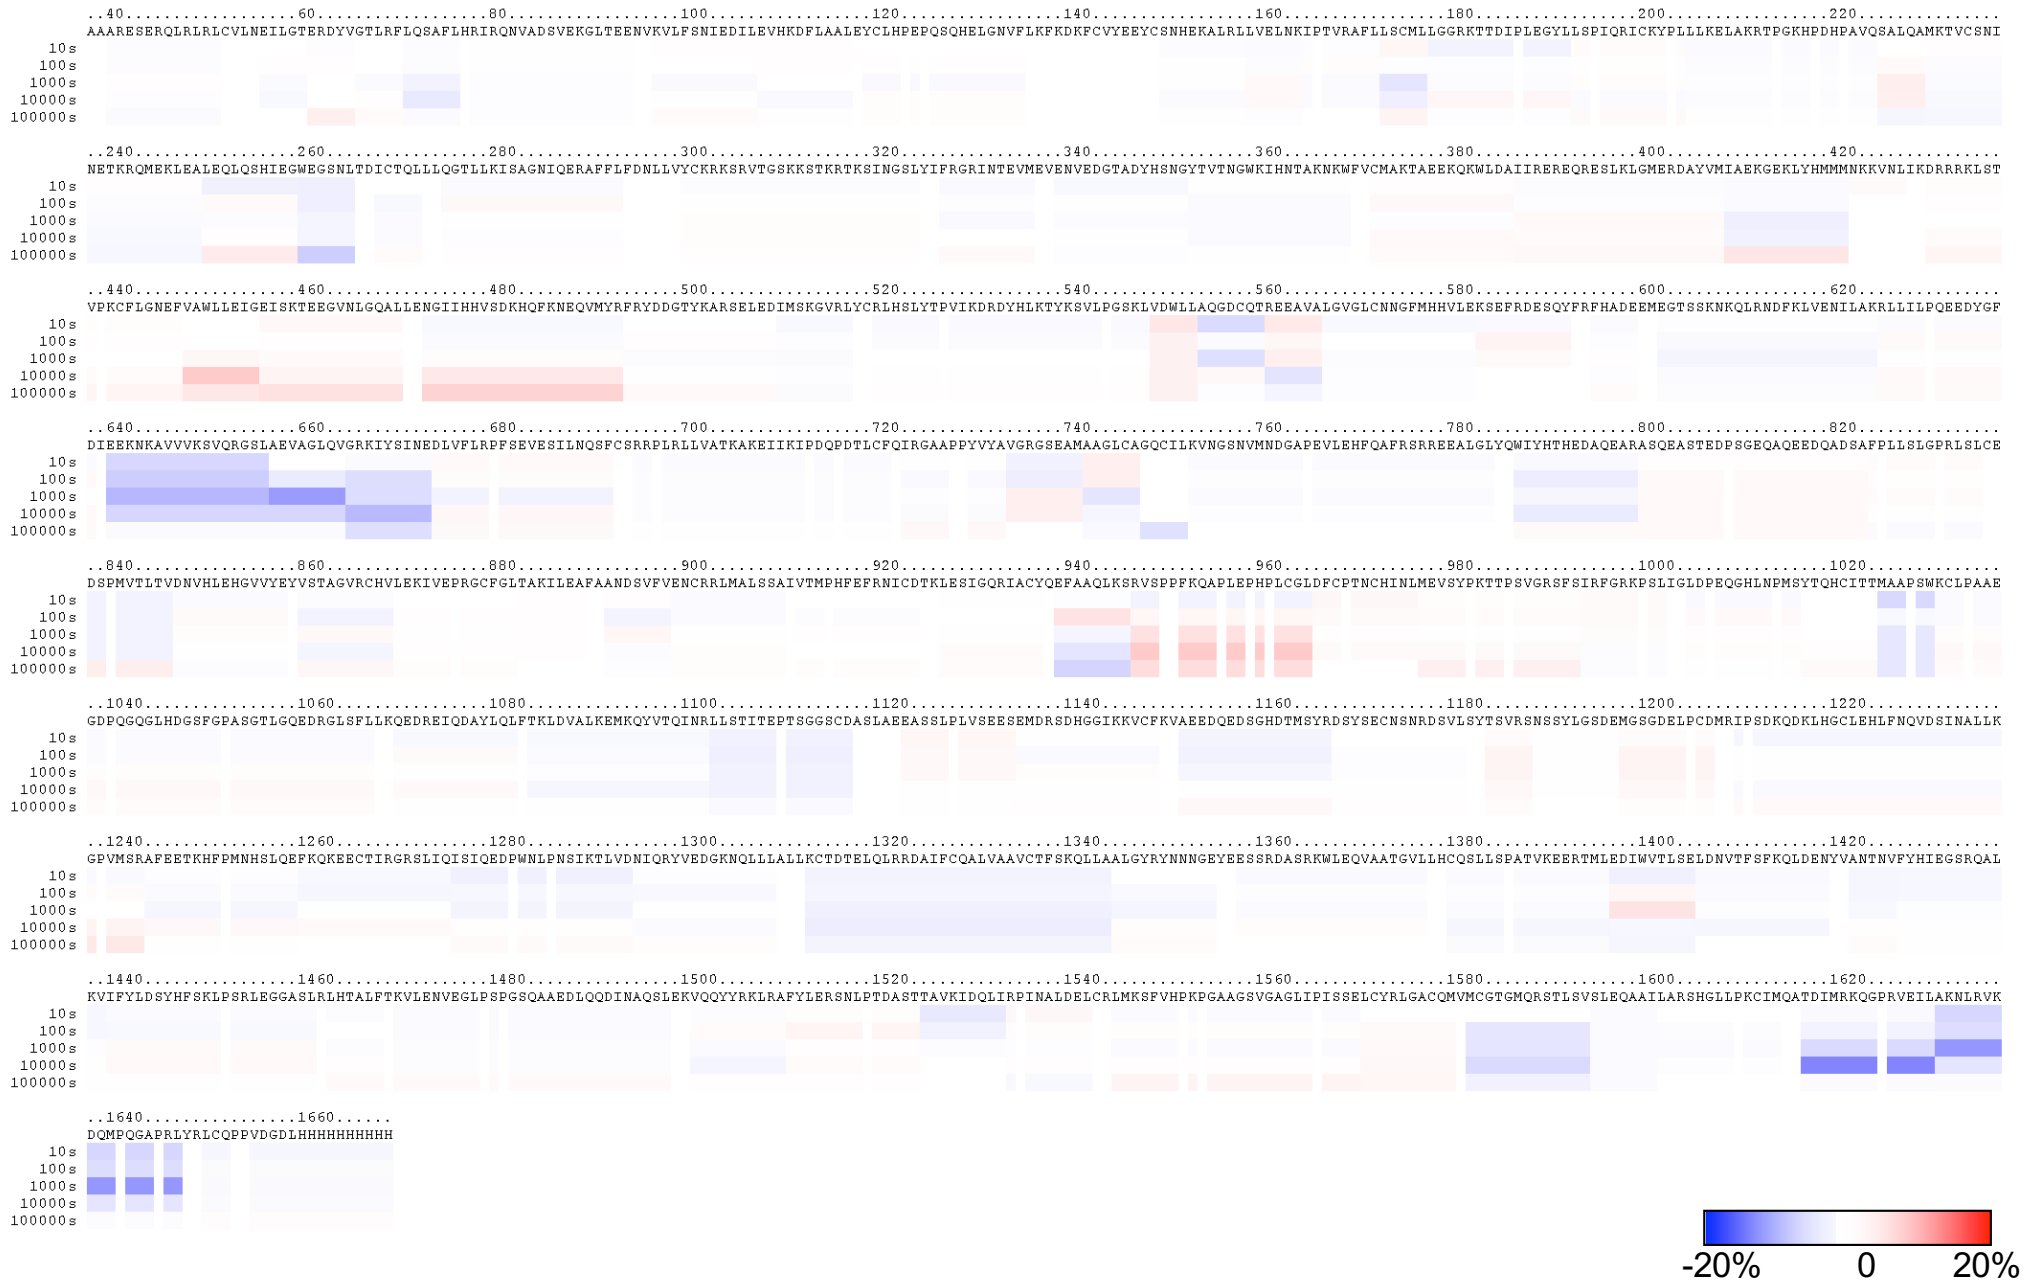

Blue indicates regions that exchange slower in presence of  $G\beta\gamma$ . Red indicates regions that exchange faster.

# Ribbon Map of G $\beta$ (% Deuteration)

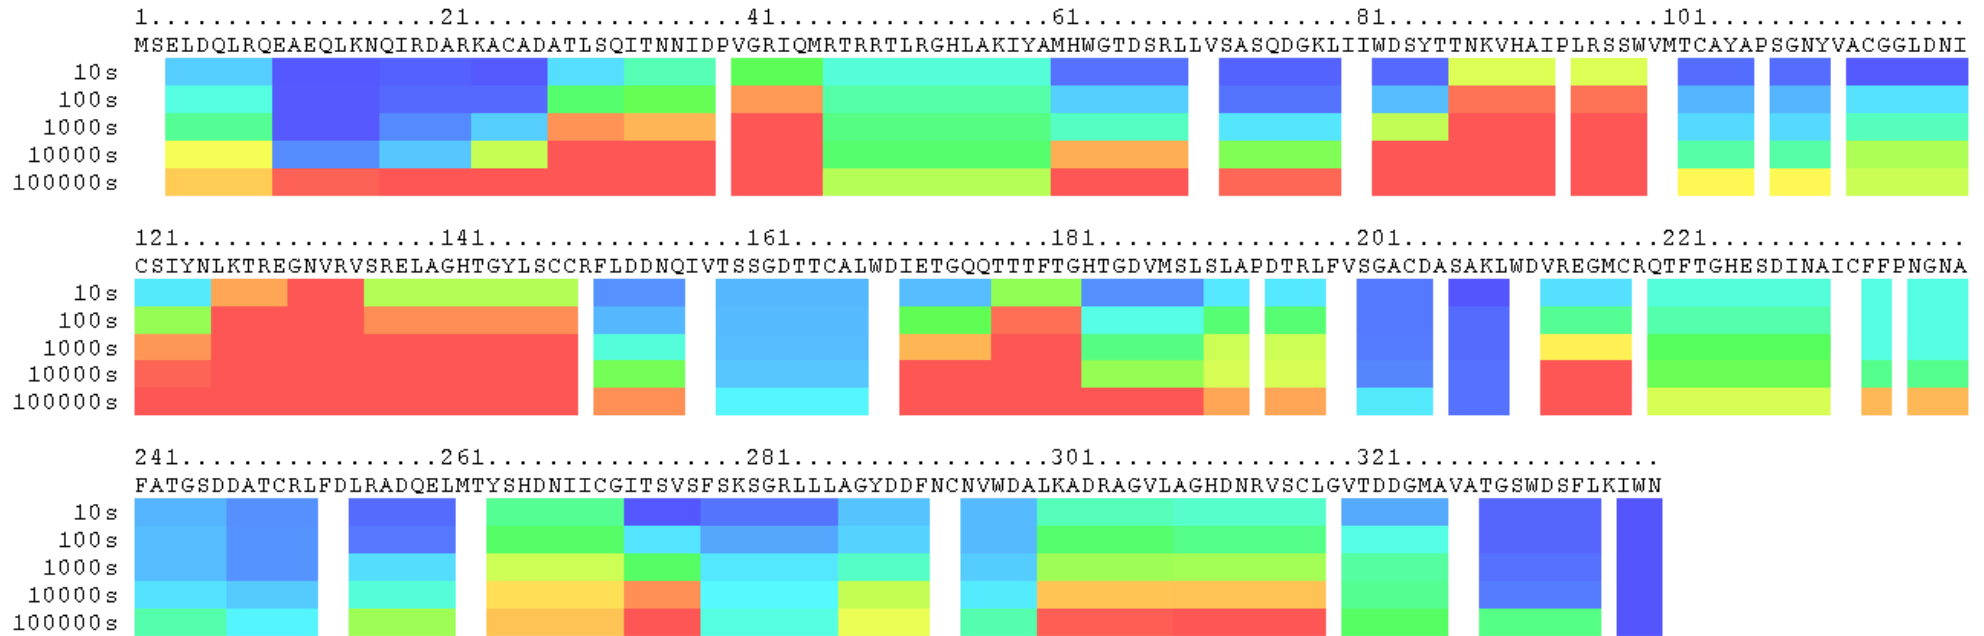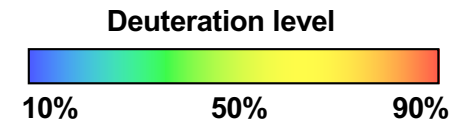

# Ribbon Map of G $\beta$ in Complex with P-Rex1 (% Deuteration)

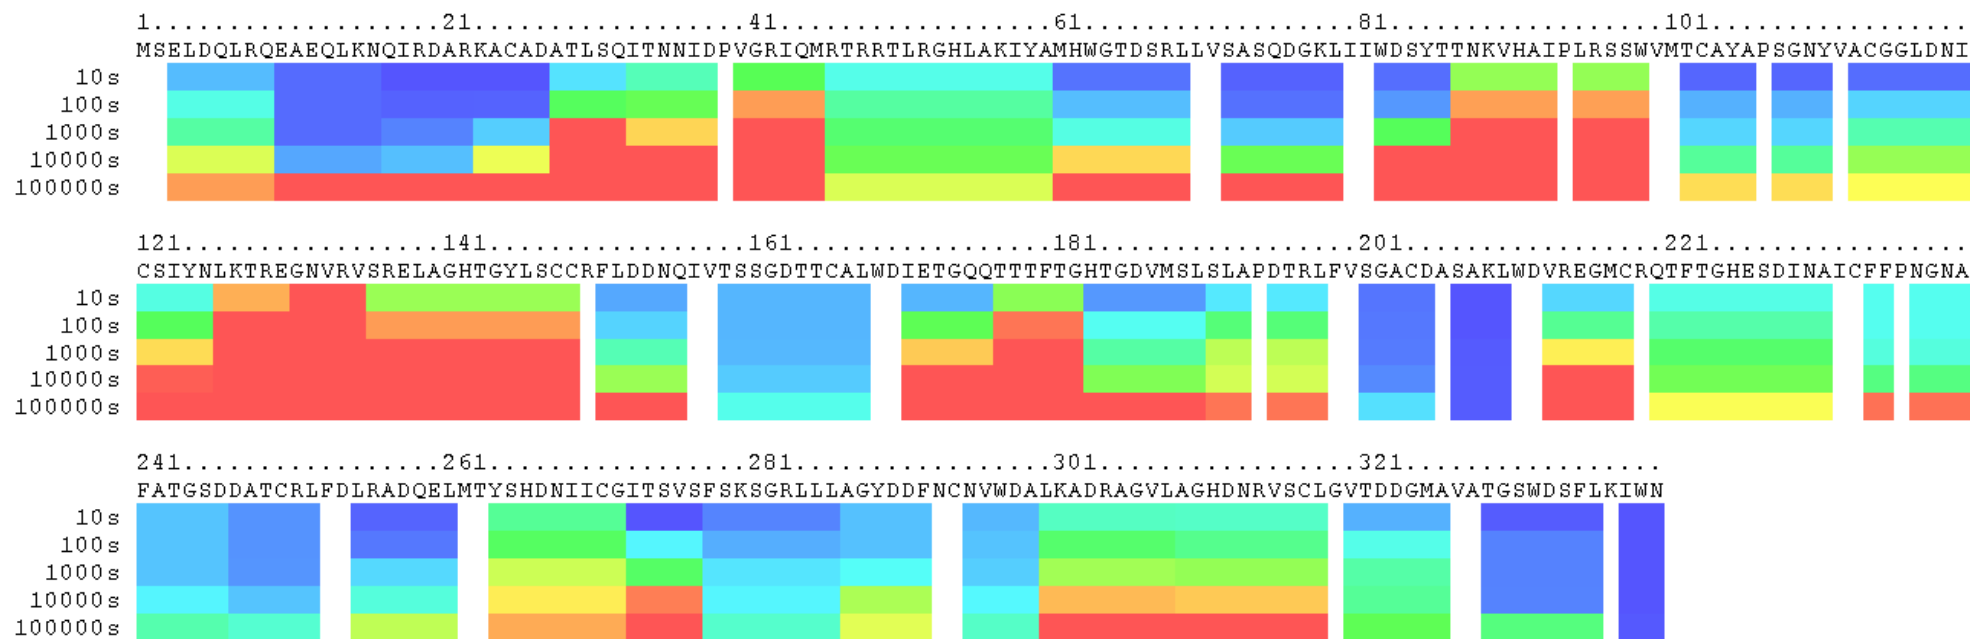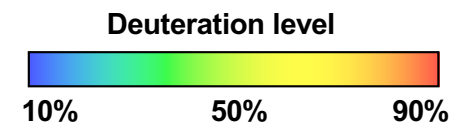

# Influence of P-Rex1 on Gβ (% Deuteration)

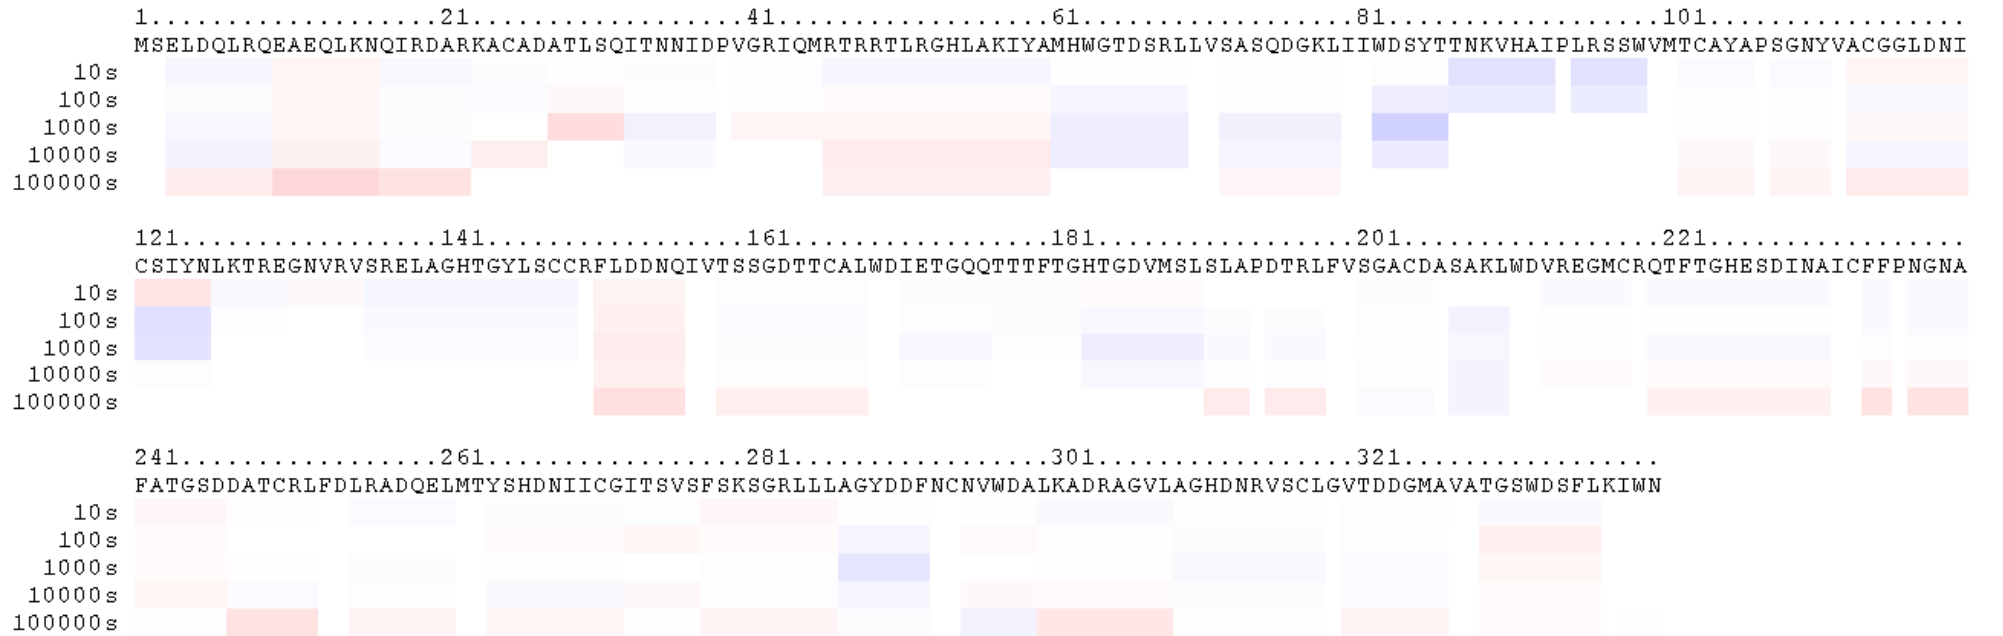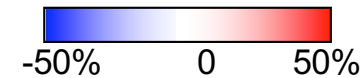

Blue indicates regions that exchange slower in presence of P-Rex1. Red indicates regions that exchange faster.

## Ribbon Map of $G\gamma$ (% Deuteration)

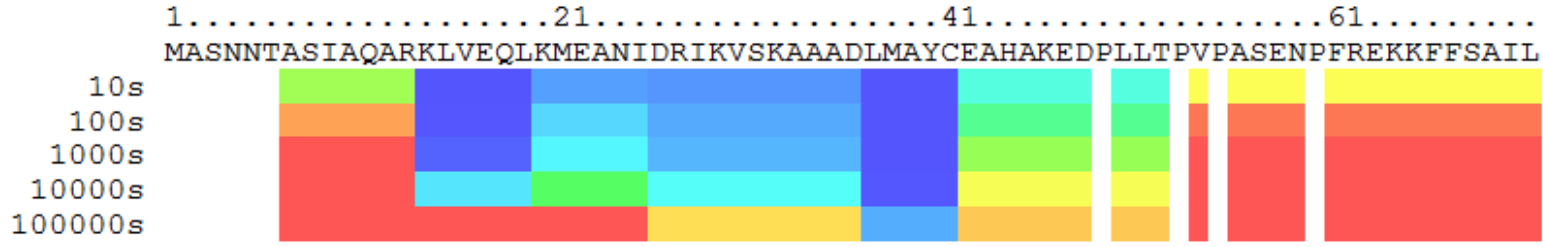

## Ribbon Map of $G\gamma$ in Presence of P-Rex1 (% Deuteration)

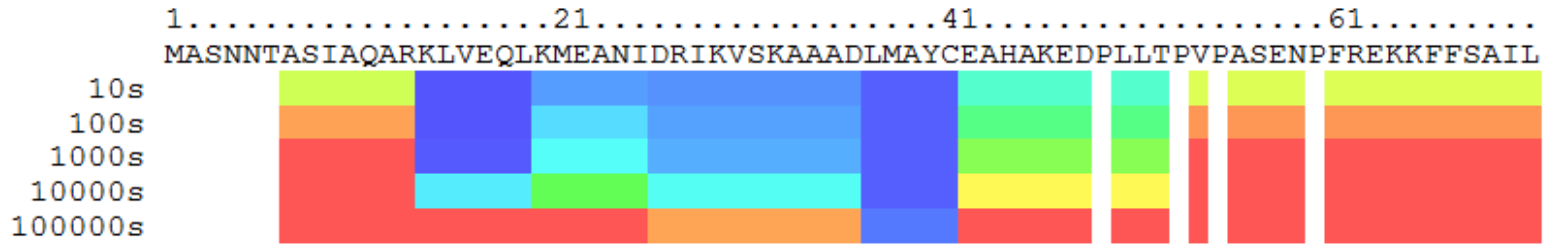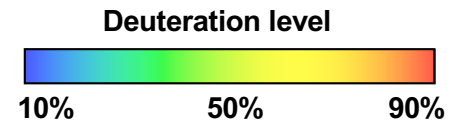

## Influence of P-Rex1 on $G\gamma$ (% Deuteration)

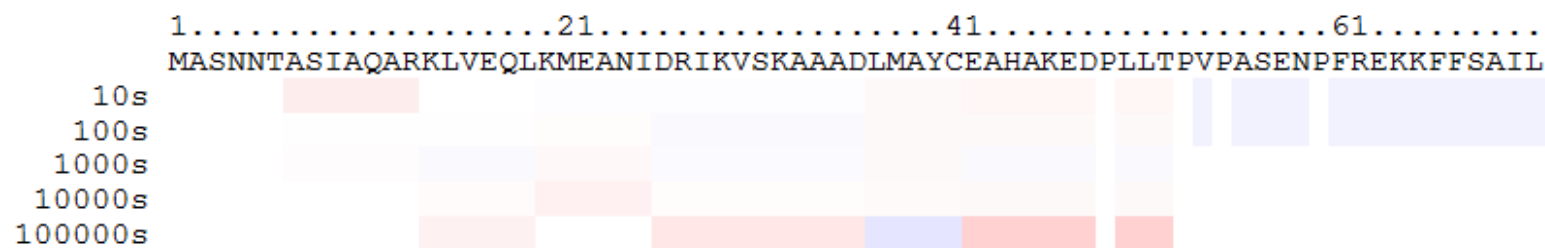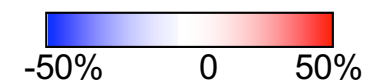

Blue indicates regions that exchange slower in presence of P-Rex1. Red indicates regions that exchange faster.
